# Supplementary material for: Concentrated poverty, ambient air pollution, and child cognitive development
Source: PubMed Central journal article supplement — Sci Adv. 2022 Nov 30;8(48):eadd0285. doi: 10.1126/sciadv.add0285 (PMC9710878; doi:10.1126/sciadv.add0285), 2022-11-30
Supplement: sciadv.add0285_sm.pdf [file sciadv.add0285_sm.pdf]

Supplementary Materials for  
**Concentrated poverty, ambient air pollution, and child cognitive development**

Geoffrey T. Wodtke *et al.*

Corresponding author: Geoffrey T. Wodtke, wodtke@uchicago.edu

*Sci. Adv.* **8**, eadd0285 (2022)  
DOI: 10.1126/sciadv.add0285

**This PDF file includes:**

Figs. S1 to S4  
Tables S1 to S10

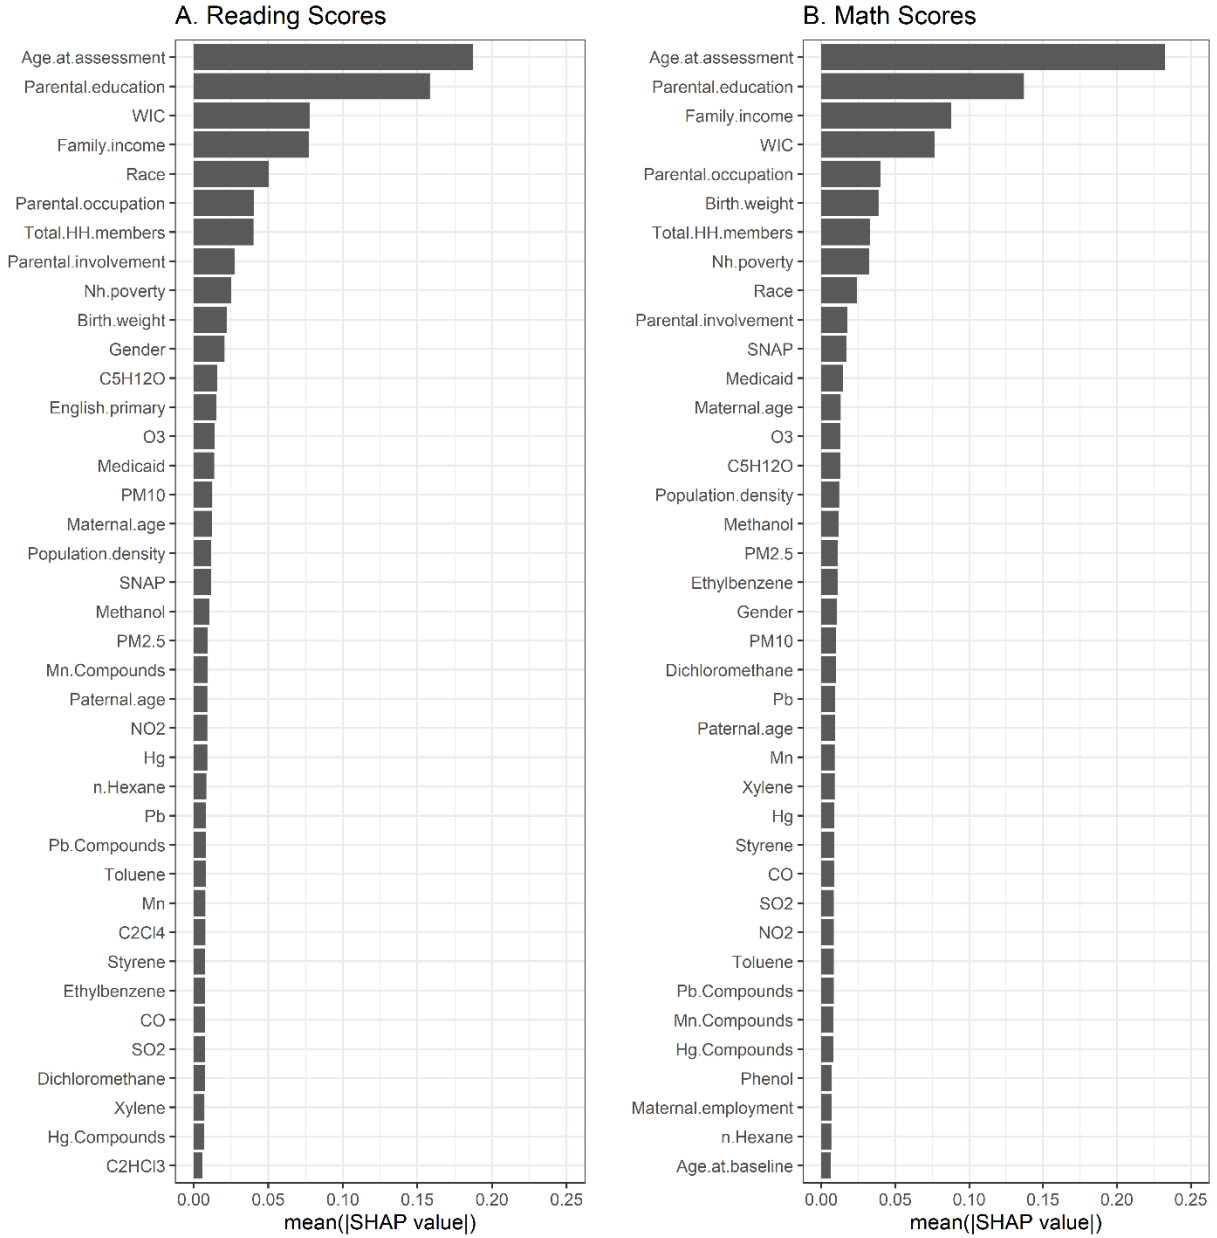

**Fig. S1. Predictive Importance of All Covariates in Models for the Conditional Mean of Test Scores given the Confounders, Neighborhood Poverty, and Measured Air Toxics.** This figure reports mean absolute SHAP values from random forests with neighborhood poverty, the full set of controls, and the full set of air toxics as predictors. Data sources: (39-42).

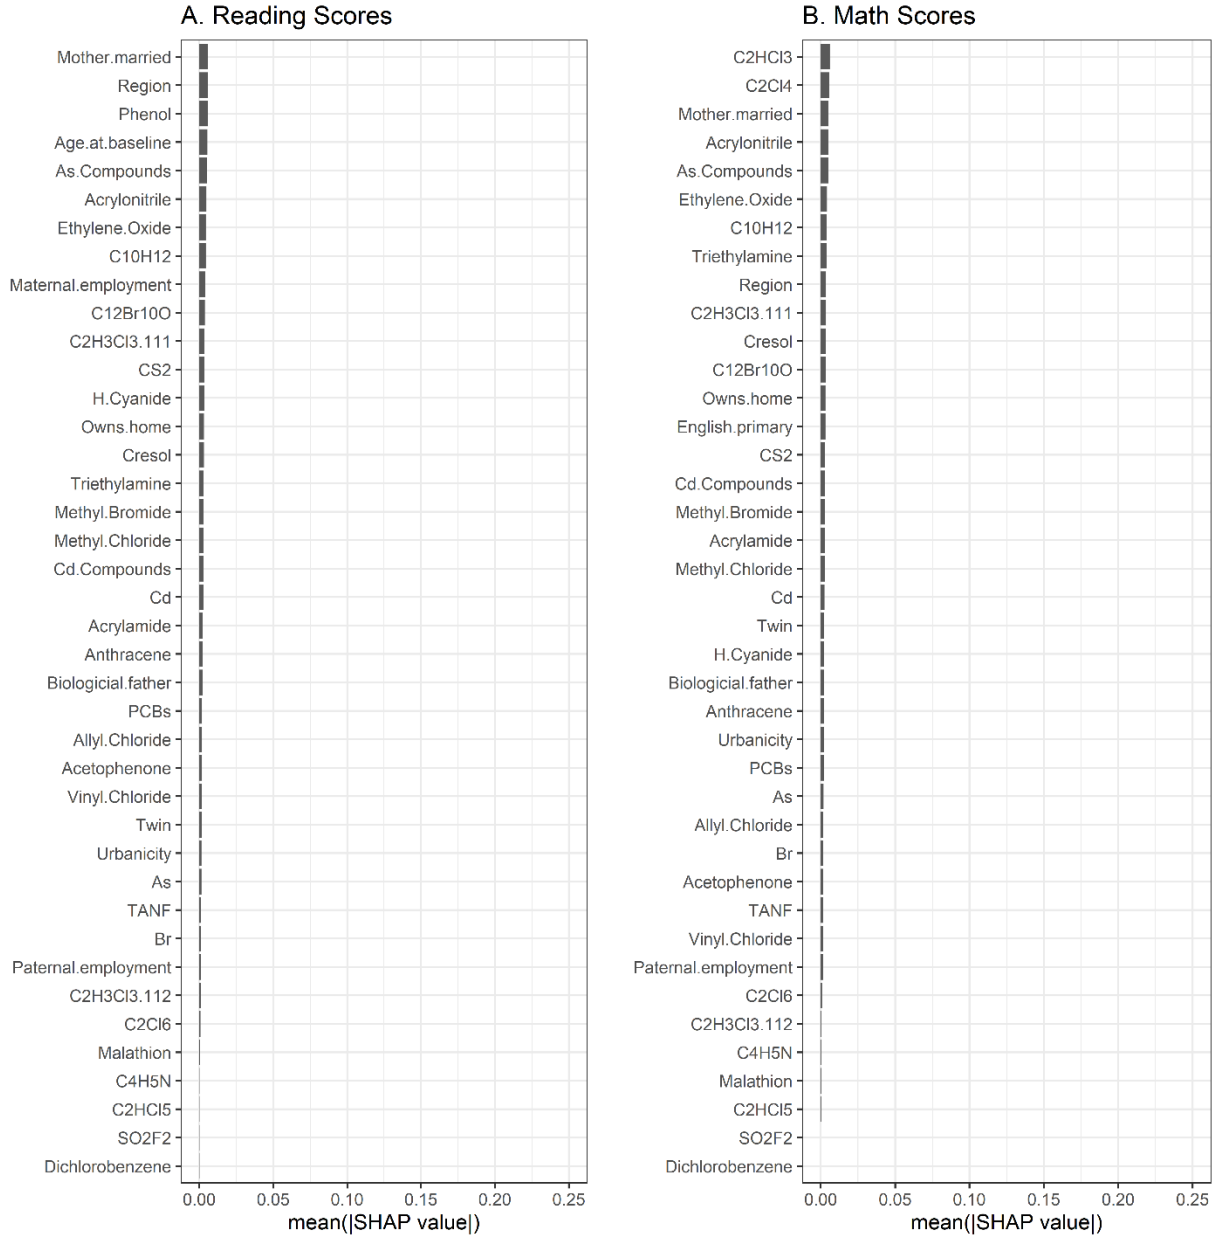

**Fig. S1 continued.**

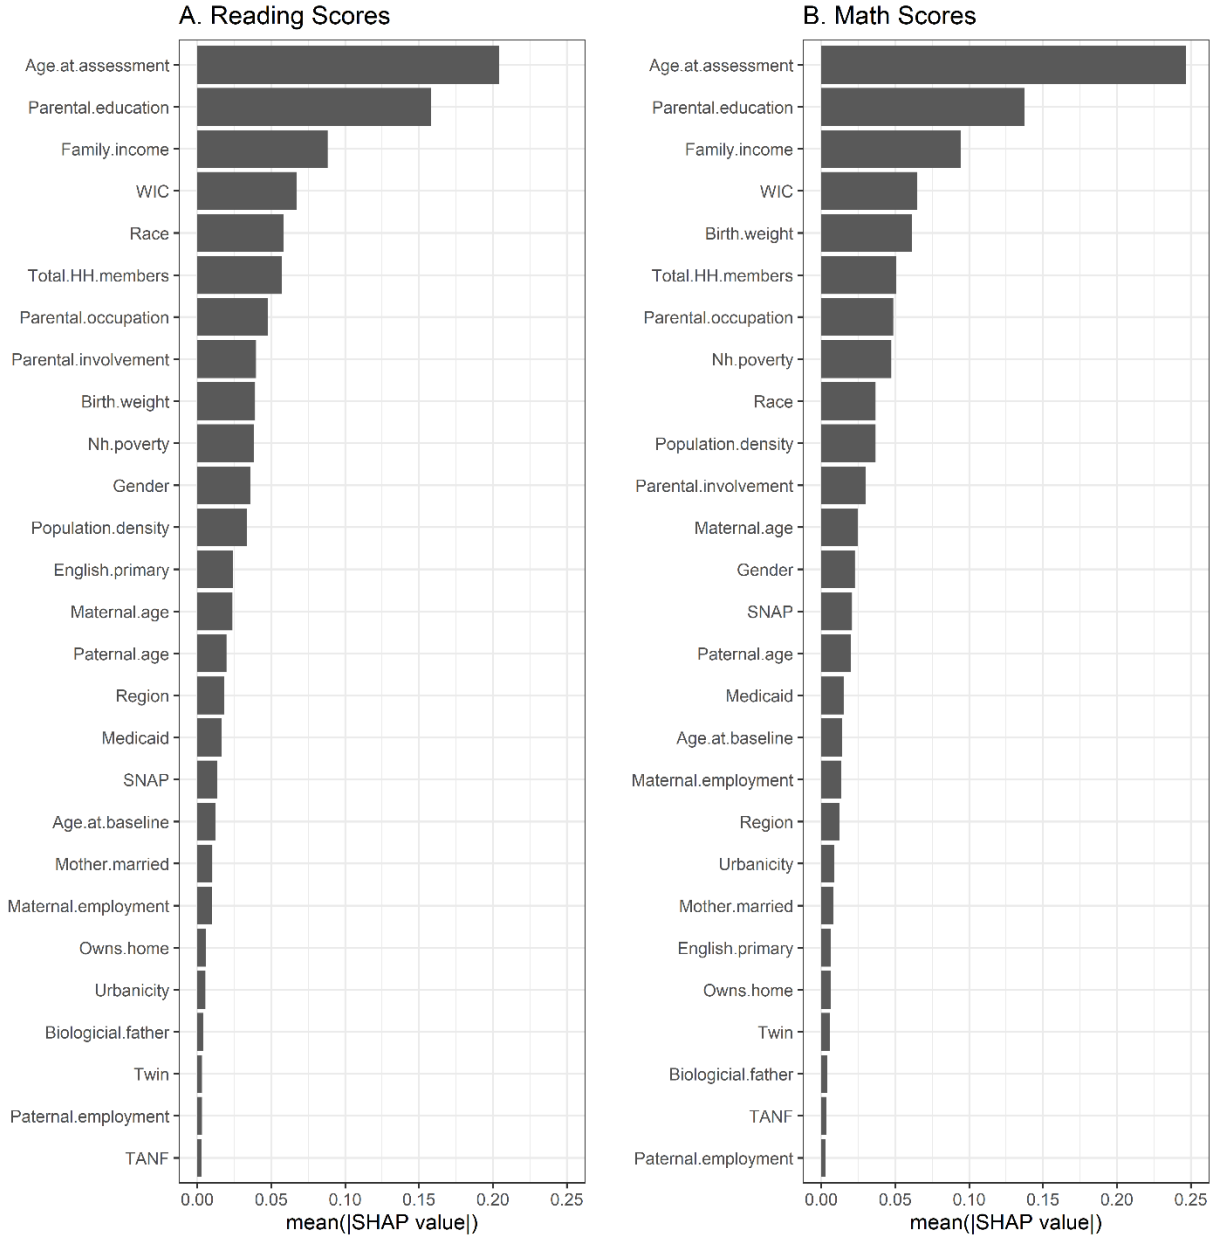

**Fig. S2. Predictive Importance of All Covariates in Models for the Conditional Mean of Test Scores given the Confounders and Neighborhood Poverty.** This figure reports mean absolute SHAP values computed from random forests with neighborhood poverty and the full set of controls, but not any air toxics, as predictors. Results are combined across 5 imputations. Data sources: (39-42).

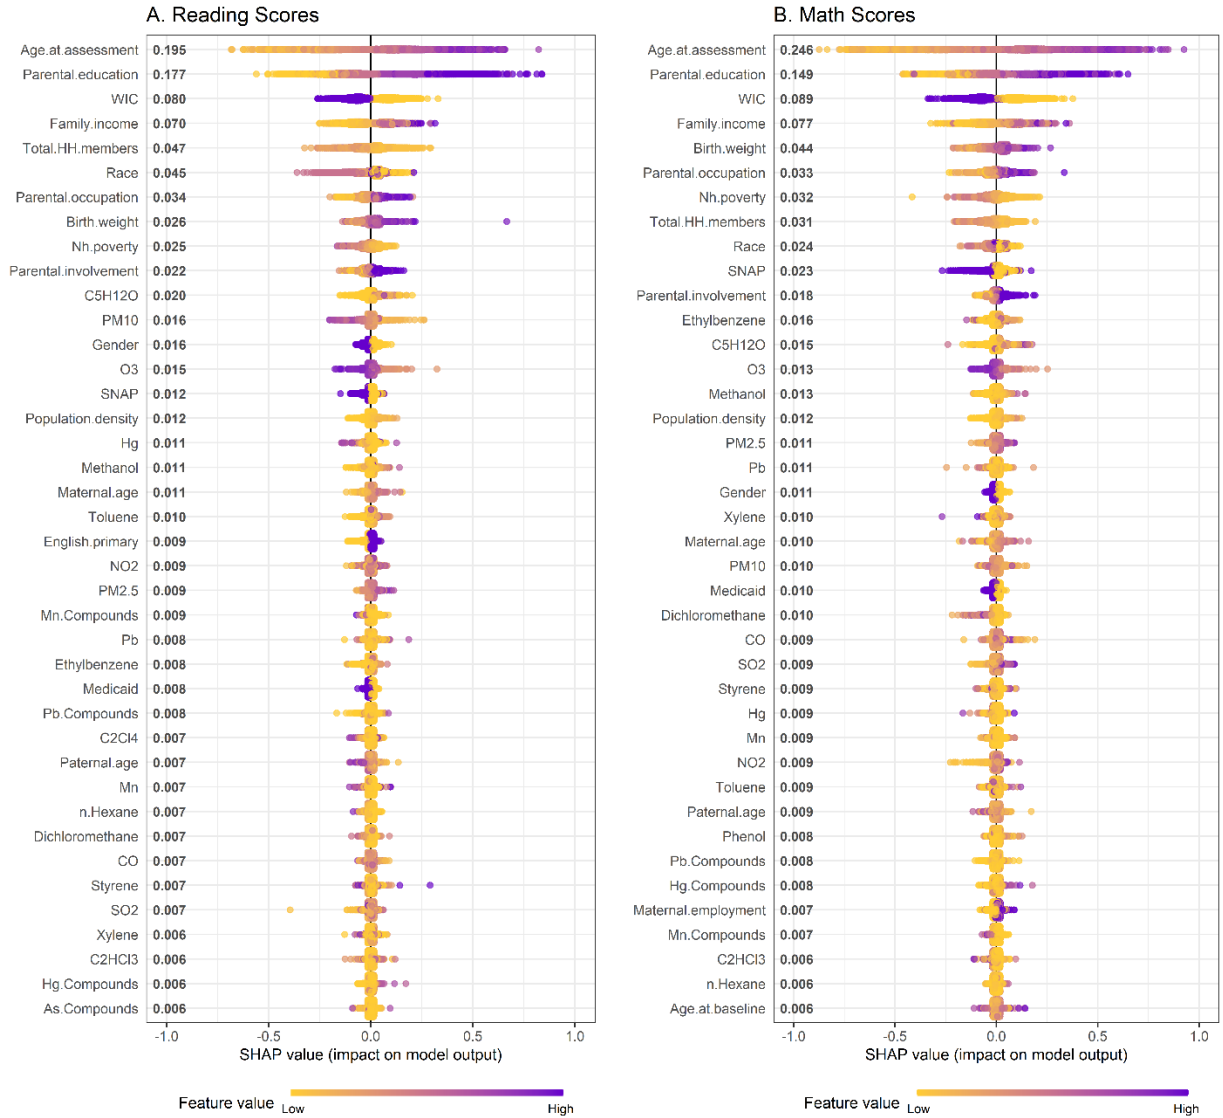

**Fig. S3. SHAP Value Summary Plot for Models of the Conditional Mean of Test Scores given the Confounders, Neighborhood Poverty, and Measured Air Toxics.** This figure reports individual SHAP values computed from random forests with neighborhood poverty, the full set of controls, and the full set of air toxics as predictors. Results are based on a single imputation. Data sources: (39-42).

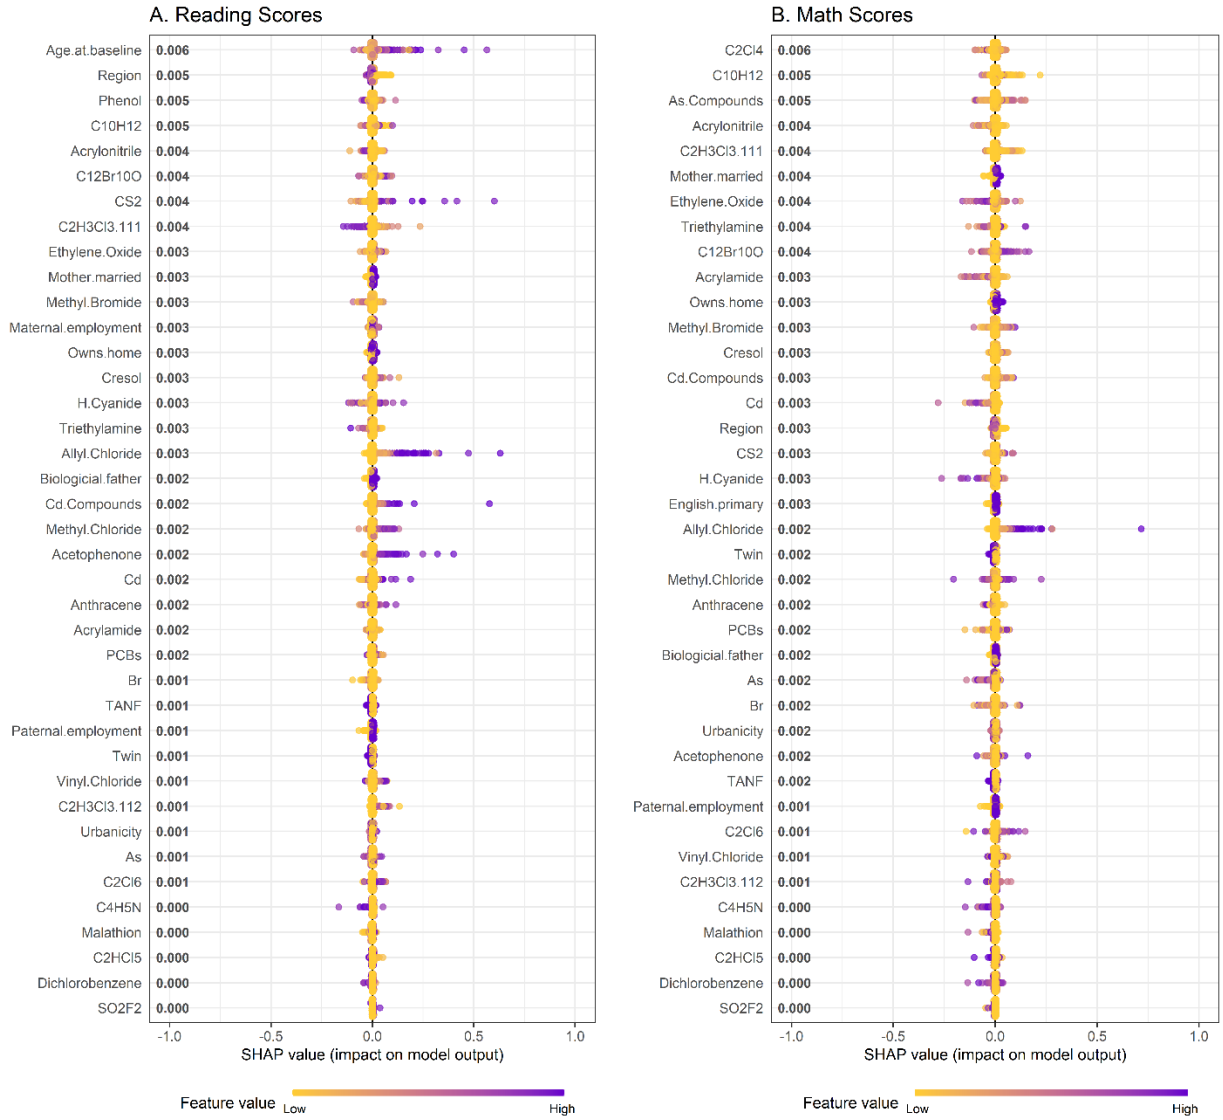

**Fig. S3 continued.**

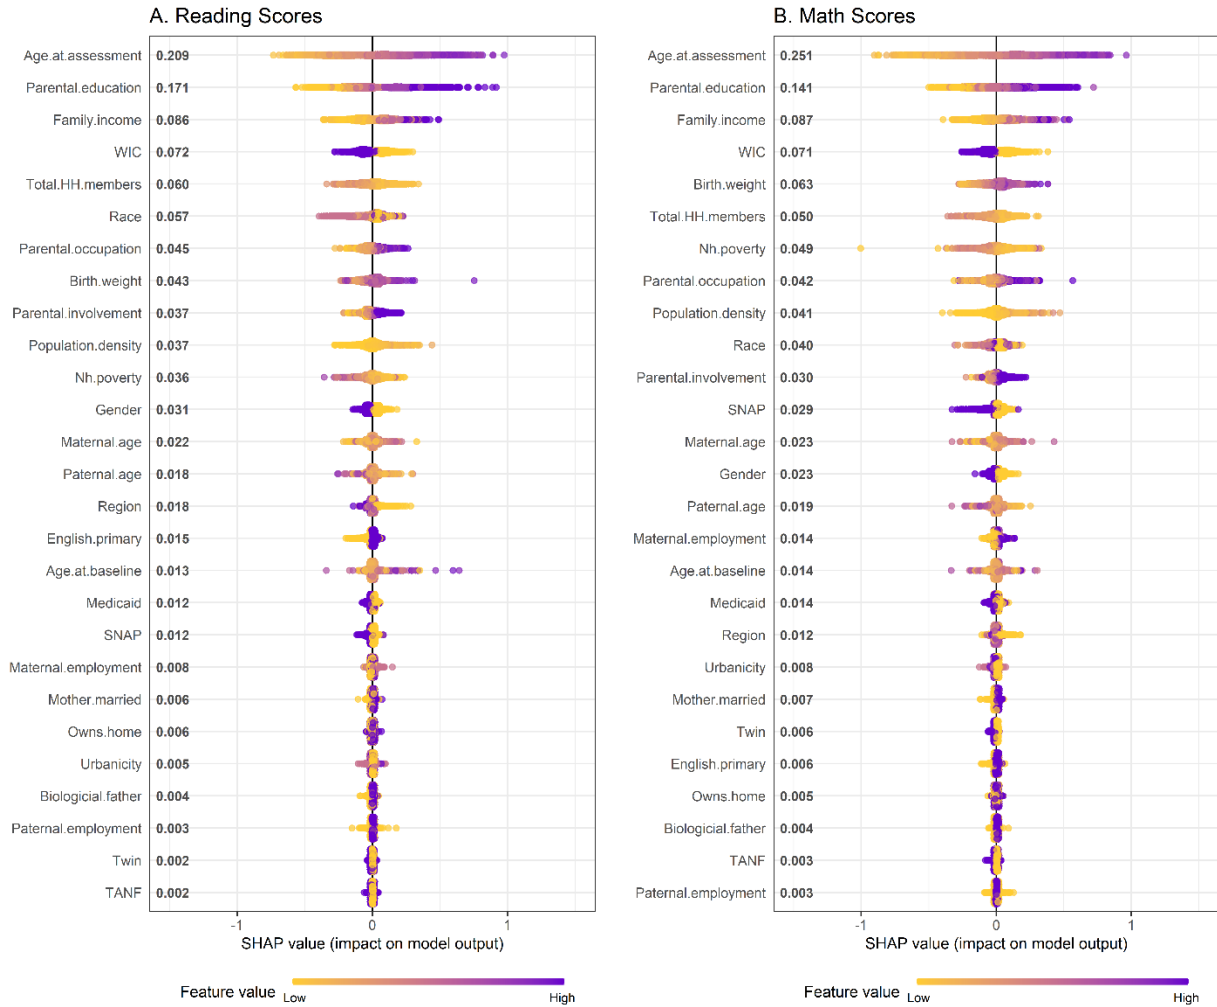

**Fig. S4. SHAP Value Summary Plot for Models of the Conditional Mean of Test Scores given the Confounders and Neighborhood Poverty.** This figure reports individual SHAP values computed from random forests with neighborhood poverty and the full set of controls, but not any air toxics, as predictors. Results are based on a single imputation. Data sources: (39-42).

**Table S1. Descriptive Statistics for Measured Air Toxics among the Total ECLS-B Sample and Separately among Quartiles of the Neighborhood Poverty Distribution**

| Air toxic (units)                                  | Abbreviated label | Total sample |         | Neighborhood poverty quartile (mean) |        |        |        |
|----------------------------------------------------|-------------------|--------------|---------|--------------------------------------|--------|--------|--------|
|                                                    |                   | Mean         | SD      | Q1                                   | Q2     | Q3     | Q4     |
| <i>Criteria air pollutants, CACES</i>              |                   |              |         |                                      |        |        |        |
| Carbon monoxide (ppm)                              | CO                | 0.469        | 0.180   | 0.422                                | 0.448  | 0.464  | 0.544  |
| Nitrogen dioxide (ppb)                             | NO2               | 14.149       | 7.356   | 13.899                               | 13.378 | 12.836 | 16.486 |
| Ozone (ppb)                                        | O3                | 49.497       | 6.283   | 50.452                               | 49.554 | 49.218 | 48.765 |
| PM10 ( $\mu\text{g}/\text{m}^3$ )                  | PM10              | 23.157       | 7.306   | 21.286                               | 22.641 | 23.073 | 25.627 |
| PM2.5 ( $\mu\text{g}/\text{m}^3$ )                 | PM2.5             | 12.713       | 3.581   | 12.350                               | 12.335 | 12.515 | 13.653 |
| Sulfur dioxide (ppb)                               | SO2               | 3.001        | 1.537   | 3.045                                | 2.931  | 2.839  | 3.191  |
| <i>Industrial neurotoxics, RSEI-GM</i>             |                   |              |         |                                      |        |        |        |
| Acetophenone ( $\text{ng}/\text{m}^3$ )            | Acetophenone      | 0.056        | 0.276   | 0.061                                | 0.035  | 0.037  | 0.092  |
| Acrylamide ( $\text{ng}/\text{m}^3$ )              | Acrylamide        | 0.003        | 0.012   | 0.003                                | 0.003  | 0.002  | 0.002  |
| Acrylonitrile ( $\text{ng}/\text{m}^3$ )           | Acrylonitrile     | 0.091        | 0.364   | 0.054                                | 0.112  | 0.095  | 0.104  |
| Allyl chloride ( $\text{ng}/\text{m}^3$ )          | Allyl.Chloride    | 0.003        | 0.028   | 0.000                                | 0.000  | 0.008  | 0.003  |
| Anthracene ( $\text{ng}/\text{m}^3$ )              | Anthracene        | 0.023        | 0.121   | 0.031                                | 0.019  | 0.012  | 0.029  |
| Arsenic ( $\text{ng}/\text{m}^3$ )                 | As                | 0.000        | 0.000   | 0.000                                | 0.000  | 0.000  | 0.000  |
| Arsenic compounds ( $\text{ng}/\text{m}^3$ )       | As.Compounds      | 0.012        | 0.042   | 0.018                                | 0.014  | 0.007  | 0.010  |
| Bromine ( $\text{ng}/\text{m}^3$ )                 | Br                | 0.002        | 0.015   | 0.002                                | 0.003  | 0.002  | 0.002  |
| Bromomethane ( $\text{ng}/\text{m}^3$ )            | Methyl.Bromide    | 0.361        | 1.190   | 0.367                                | 0.333  | 0.258  | 0.487  |
| Cadmium ( $\text{ng}/\text{m}^3$ )                 | Cd                | 0.000        | 0.001   | 0.000                                | 0.000  | 0.000  | 0.000  |
| Cadmium compounds ( $\text{ng}/\text{m}^3$ )       | Cd.Compounds      | 0.006        | 0.026   | 0.005                                | 0.006  | 0.004  | 0.010  |
| Carbon disulfide ( $\text{ng}/\text{m}^3$ )        | CS2               | 0.168        | 0.661   | 0.118                                | 0.110  | 0.117  | 0.325  |
| Chloromethane ( $\text{ng}/\text{m}^3$ )           | Methyl.Chloride   | 0.628        | 2.328   | 0.658                                | 0.536  | 0.517  | 0.799  |
| Cresol ( $\text{ng}/\text{m}^3$ )                  | Cresol            | 0.057        | 0.229   | 0.042                                | 0.056  | 0.065  | 0.065  |
| Decabromodiphenyl ether ( $\text{ng}/\text{m}^3$ ) | C12Br100          | 0.007        | 0.026   | 0.011                                | 0.006  | 0.004  | 0.005  |
| Dichlorobenzene ( $\text{ng}/\text{m}^3$ )         | Dichlorobenzene   | 0.000        | 0.000   | 0.000                                | 0.000  | 0.000  | 0.000  |
| Dichloromethane ( $\text{ng}/\text{m}^3$ )         | Dichloromethane   | 13.814       | 32.823  | 14.578                               | 13.419 | 12.830 | 14.432 |
| Dicyclopentadiene ( $\text{ng}/\text{m}^3$ )       | C10H12            | 0.035        | 0.173   | 0.026                                | 0.026  | 0.026  | 0.064  |
| Ethylbenzene ( $\text{ng}/\text{m}^3$ )            | Ethylbenzene      | 5.372        | 9.768   | 5.144                                | 5.339  | 4.368  | 6.639  |
| Ethylene oxide ( $\text{ng}/\text{m}^3$ )          | Ethylene.Oxide    | 0.301        | 0.846   | 0.346                                | 0.298  | 0.219  | 0.341  |
| Hexachloroethane ( $\text{ng}/\text{m}^3$ )        | C2Cl6             | 0.000        | 0.003   | 0.000                                | 0.000  | 0.000  | 0.000  |
| Hydrogen cyanide ( $\text{ng}/\text{m}^3$ )        | H.Cyanide         | 0.131        | 0.586   | 0.139                                | 0.116  | 0.113  | 0.157  |
| Lead ( $\text{ng}/\text{m}^3$ )                    | Pb                | 0.234        | 0.578   | 0.216                                | 0.247  | 0.173  | 0.302  |
| Lead compounds ( $\text{ng}/\text{m}^3$ )          | Pb.Compounds      | 0.481        | 1.163   | 0.365                                | 0.377  | 0.417  | 0.764  |
| Malathion ( $\text{ng}/\text{m}^3$ )               | Malathion         | 0.000        | 0.000   | 0.000                                | 0.000  | 0.000  | 0.000  |
| Manganese ( $\text{ng}/\text{m}^3$ )               | Mn                | 0.489        | 1.642   | 0.364                                | 0.397  | 0.524  | 0.671  |
| Manganese compounds ( $\text{ng}/\text{m}^3$ )     | Mn.Compounds      | 0.523        | 1.595   | 0.434                                | 0.455  | 0.475  | 0.727  |
| Mercury ( $\text{ng}/\text{m}^3$ )                 | Hg                | 0.006        | 0.018   | 0.004                                | 0.004  | 0.006  | 0.011  |
| Mercury compounds ( $\text{ng}/\text{m}^3$ )       | Hg.Compounds      | 0.011        | 0.023   | 0.011                                | 0.010  | 0.008  | 0.015  |
| Methacrylonitrile ( $\text{ng}/\text{m}^3$ )       | C4H5N             | 0.000        | 0.000   | 0.000                                | 0.000  | 0.000  | 0.000  |
| Methanol ( $\text{ng}/\text{m}^3$ )                | Methanol          | 56.794       | 113.993 | 32.108                               | 50.343 | 61.982 | 82.762 |
| Methyl tert-butyl ether ( $\text{ng}/\text{m}^3$ ) | C5H12O            | 7.245        | 17.029  | 5.444                                | 5.908  | 5.615  | 12.014 |



**Table S1 continued.**

| Air toxic (units)                              | Abbreviated label | Total sample |        | Neighborhood poverty quartile (mean) |        |        |        |
|------------------------------------------------|-------------------|--------------|--------|--------------------------------------|--------|--------|--------|
|                                                |                   | Mean         | SD     | Q1                                   | Q2     | Q3     | Q4     |
| Pentachloroethane (ng/m <sup>3</sup> )         | C2HCl5            | 0.000        | 0.000  | 0.000                                | 0.000  | 0.000  | 0.000  |
| Phenol (ng/m <sup>3</sup> )                    | Phenol            | 1.572        | 4.323  | 1.224                                | 1.201  | 1.574  | 2.289  |
| Polychlorinated biphenyls (ng/m <sup>3</sup> ) | PCBs              | 0.000        | 0.001  | 0.000                                | 0.000  | 0.000  | 0.000  |
| Styrene (ng/m <sup>3</sup> )                   | Styrene           | 32.899       | 74.039 | 23.409                               | 29.466 | 40.690 | 38.041 |
| Sulfuryl fluoride (ng/m <sup>3</sup> )         | SO2F2             | 0.001        | 0.025  | 0.001                                | 0.002  | 0.000  | 0.002  |
| Tetrachloroethylene (ng/m <sup>3</sup> )       | C2Cl4             | 5.324        | 16.798 | 3.634                                | 4.328  | 4.558  | 8.780  |
| Toluene (ng/m <sup>3</sup> )                   | Toluene           | 51.790       | 87.360 | 40.394                               | 48.660 | 49.260 | 68.849 |
| Trichloroethane 1,1,1 (ng/m <sup>3</sup> )     | C2H3Cl3.111       | 0.151        | 0.719  | 0.054                                | 0.079  | 0.113  | 0.359  |
| Trichloroethane 1,1,2 (ng/m <sup>3</sup> )     | C2H3Cl3.112       | 0.000        | 0.003  | 0.000                                | 0.000  | 0.001  | 0.001  |
| Trichloroethylene (ng/m <sup>3</sup> )         | C2HCl3            | 12.455       | 34.078 | 15.781                               | 11.387 | 8.284  | 14.367 |
| Triethylamine (ng/m <sup>3</sup> )             | Triethylamine     | 0.122        | 0.464  | 0.142                                | 0.146  | 0.107  | 0.092  |
| Vinyl chloride (ng/m <sup>3</sup> )            | Vinyl.Chloride    | 0.108        | 0.871  | 0.055                                | 0.066  | 0.119  | 0.192  |
| Xylene (ng/m <sup>3</sup> )                    | Xylene            | 42.442       | 70.673 | 37.208                               | 43.308 | 34.348 | 54.904 |
| n-Hexane (ng/m <sup>3</sup> )                  | n.Hexane          | 24.310       | 62.406 | 20.592                               | 29.800 | 18.994 | 27.852 |

Notes: results are weighted to adjust for the ECLS-B complex sample design and combined across 5 multiply imputed datasets; toxic measures are annual average estimates of the amount of the pollutant in a sample member's zip code tabulation area; ppm = parts per million; ppb = parts per billion; µg/m<sup>3</sup> = micrograms per cubic meter; ng/m<sup>3</sup> = nanograms per cubic meter. Data sources: (39-42)

**Table S2. Descriptive Statistics for Outcomes, Exposure, and Covariates**

| Variable                         | Freq. to<br>nearest 100 | Percent | Mean  | SD   |
|----------------------------------|-------------------------|---------|-------|------|
| <i>Outcomes</i>                  |                         |         |       |      |
| Reading scores (unstandardized)  |                         |         | -0.51 | 0.74 |
| Math scores (unstandardized)     |                         |         | -0.49 | 0.78 |
| <i>Exposure</i>                  |                         |         |       |      |
| Neighborhood poverty rate        |                         |         | 0.13  | 0.09 |
| <i>Covariates</i>                |                         |         |       |      |
| Gender, %                        |                         |         |       |      |
| Male                             | 5500                    | 51.11   |       |      |
| Female                           | 5200                    | 48.89   |       |      |
| Race                             |                         |         |       |      |
| White (non-hispanic)             | 5700                    | 53.36   |       |      |
| Black (non-hispanic)             | 1500                    | 13.72   |       |      |
| Hispanic                         | 2700                    | 25.50   |       |      |
| Asian                            | 300                     | 2.80    |       |      |
| Other                            | 500                     | 4.62    |       |      |
| Twin                             |                         |         |       |      |
| Yes                              | 10400                   | 97.06   |       |      |
| No                               | 300                     | 2.94    |       |      |
| Homeownership                    |                         |         |       |      |
| Owns home                        | 5100                    | 47.82   |       |      |
| Does not own home                | 5600                    | 52.18   |       |      |
| Biological father in household   |                         |         |       |      |
| Yes                              | 8400                    | 78.73   |       |      |
| No                               | 2300                    | 21.27   |       |      |
| Maternal marital status          |                         |         |       |      |
| Married                          | 7400                    | 69.30   |       |      |
| Not married                      | 3300                    | 30.70   |       |      |
| Parental education               |                         |         |       |      |
| <HS degree                       | 1500                    | 13.83   |       |      |
| HS degree or equivalent          | 2700                    | 25.04   |       |      |
| Technical degree OR some college | 3200                    | 29.53   |       |      |
| Bachelor's degree                | 2100                    | 19.75   |       |      |
| Graduate degree                  | 1300                    | 11.85   |       |      |

**Table S2 continued.**

| Variable                         | Freq. to<br>nearest 100 | Percent | Mean | SD |
|----------------------------------|-------------------------|---------|------|----|
| Maternal employment              |                         |         |      |    |
| Working $\geq$ 35 hours per week | 3400                    | 32.22   |      |    |
| Working <35 hours per week       | 2100                    | 19.76   |      |    |
| Not in labor force               | 5100                    | 48.02   |      |    |
| Paternal employment              |                         |         |      |    |
| Working                          | 9900                    | 92.36   |      |    |
| Not working                      | 800                     | 7.64    |      |    |
| Primary home language            |                         |         |      |    |
| English                          | 8700                    | 81.25   |      |    |
| Not English                      | 2000                    | 18.75   |      |    |
| Parent reads to child            |                         |         |      |    |
| Not at all                       | 1300                    | 12.12   |      |    |
| Once or twice per week           | 3500                    | 33.16   |      |    |
| Three to six times per week      | 2400                    | 22.21   |      |    |
| Every day                        | 3500                    | 32.51   |      |    |
| WIC                              |                         |         |      |    |
| Recipient                        | 5600                    | 52.29   |      |    |
| Not a recipient                  | 5100                    | 47.71   |      |    |
| SNAP                             |                         |         |      |    |
| Recipient                        | 2200                    | 20.40   |      |    |
| Not a recipient                  | 8500                    | 79.60   |      |    |
| Medicaid                         |                         |         |      |    |
| Recipient                        | 4100                    | 37.96   |      |    |
| Not a recipient                  | 6600                    | 62.04   |      |    |
| TANF                             |                         |         |      |    |
| Recipient                        | 900                     | 8.23    |      |    |
| Not a recipient                  | 9800                    | 91.77   |      |    |
| Urbanicity                       |                         |         |      |    |
| Urban                            | 7900                    | 73.70   |      |    |
| Suburban                         | 1300                    | 11.84   |      |    |
| Rural                            | 1500                    | 14.46   |      |    |

**Table S2 continued.**

| Variable                                         | Freq. to<br>nearest 100 | Percent | Mean    | SD      |
|--------------------------------------------------|-------------------------|---------|---------|---------|
| Census division                                  |                         |         |         |         |
| Northeast                                        | 1800                    | 16.74   |         |         |
| Midwest                                          | 2400                    | 22.33   |         |         |
| South                                            | 4000                    | 37.21   |         |         |
| West                                             | 2500                    | 23.72   |         |         |
| Birthweight (g)                                  |                         |         | 3311.8  | 598.8   |
| Child's age at baseline (months)                 |                         |         | 10.5    | 1.9     |
| Child's age at assessment (months)               |                         |         | 52.4    | 4.1     |
| Mother's age at baseline (years)                 |                         |         | 28.3    | 6.3     |
| Father's age at baseline (years)                 |                         |         | 31.1    | 7.1     |
| Family income (usd)                              |                         |         | 50509.5 | 46795.5 |
| Parental occupational status                     |                         |         | 43.4    | 10.9    |
| Household size (count)                           |                         |         | 4.3     | 1.5     |
| ZCTA population density (count/km <sup>3</sup> ) |                         |         | 3177.2  | 5163.8  |

Notes: results are weighted to adjust for the ECLS-B complex sample design and combined across 5 multiply imputed datasets; cell counts are rounded to the nearest 100 in accordance with disclosure risk requirements from the U.S. Institute of Education Sciences; ZCTA = zip code tabulation area. Data sources: (39-42).

**Table S3. Total, Direct, and Indirect Effects of Neighborhood Context based on a Multidimensional Index of Socioeconomic Disadvantage**

| Estimands                  | Point Estimate | [2.5, 97.5] Percentile Bootstrap Interval |
|----------------------------|----------------|-------------------------------------------|
| <i>Reading Test Scores</i> |                |                                           |
| Average Total Effect       | -0.098         | [-0.187, -0.046]                          |
| Natural Direct Effect      | -0.078         | [-0.135, -0.037]                          |
| Natural Indirect Effect    | -0.019         | [-0.067, 0.000]                           |
| <i>Math Test Scores</i>    |                |                                           |
| Average Total Effect       | -0.099         | [-0.176, -0.037]                          |
| Natural Direct Effect      | -0.074         | [-0.124, -0.033]                          |
| Natural Indirect Effect    | -0.025         | [-0.064, 0.008]                           |

Notes: estimates are reported in standard deviation units and are computed using regression-imputation and random forests; they are weighted and combined across 5 imputations; confidence intervals are based on the [2.5, 97.5] percentiles of a pooled sampling distribution simulated via the repeated half-sample bootstrap with 1000 replications per imputation; the index of neighborhood disadvantage is the first principle component from a PCA of the poverty rate, the unemployment rate, the proportion of adult residents with less than a high school education, the proportion of households that are female-headed, and the proportion of the population that identifies as black in a ZCTA; effect estimates contrast living a neighborhood at the 90<sup>th</sup> percentile, rather than the 20<sup>th</sup> percentile, of the neighborhood disadvantage index. Data sources: (39-42).

**Table S4. Estimates for Total, Direct, and Indirect Effects of Alternative Contrasts in Neighborhood Poverty**

| Estimands                    | Reading Test Scores |                                           | Math Test Scores |                                           |
|------------------------------|---------------------|-------------------------------------------|------------------|-------------------------------------------|
|                              | Point Estimate      | [2.5, 97.5] Percentile Bootstrap Interval | Point Estimate   | [2.5, 97.5] Percentile Bootstrap Interval |
| <i>10% versus 5% Poverty</i> |                     |                                           |                  |                                           |
| Average Total Effect         | -0.015              | [-0.046, 0.010]                           | -0.037           | [-0.081, 0.000]                           |
| Natural Direct Effect        | -0.007              | [-0.021, 0.006]                           | -0.021           | [-0.052, 0.002]                           |
| Natural Indirect Effect      | -0.008              | [-0.031, 0.009]                           | -0.016           | [-0.038, 0.002]                           |
| <i>15% versus 5% Poverty</i> |                     |                                           |                  |                                           |
| Average Total Effect         | -0.036              | [-0.082, -0.006]                          | -0.066           | [-0.124, -0.017]                          |
| Natural Direct Effect        | -0.026              | [-0.050, -0.008]                          | -0.043           | [-0.090, -0.013]                          |
| Natural Indirect Effect      | -0.010              | [-0.037, 0.006]                           | -0.022           | [-0.044, 0.001]                           |
| <i>20% versus 5% Poverty</i> |                     |                                           |                  |                                           |
| Average Total Effect         | -0.066              | [-0.125, -0.029]                          | -0.102           | [-0.163, -0.042]                          |
| Natural Direct Effect        | -0.042              | [-0.078, -0.020]                          | -0.067           | [-0.118, -0.026]                          |
| Natural Indirect Effect      | -0.024              | [-0.054, -0.003]                          | -0.035           | [-0.056, -0.010]                          |
| <i>30% versus 5% Poverty</i> |                     |                                           |                  |                                           |
| Average Total Effect         | -0.085              | [-0.161, -0.041]                          | -0.119           | [-0.190, -0.041]                          |
| Natural Direct Effect        | -0.060              | [-0.105, -0.033]                          | -0.084           | [-0.142, -0.032]                          |
| Natural Indirect Effect      | -0.025              | [-0.066, -0.002]                          | -0.036           | [-0.066, -0.002]                          |

Notes: estimates are reported in standard deviation units and are computed using regression-imputation and random forests; they are weighted and combined across 5 imputations; confidence intervals are based on the [2.5, 97.5] percentiles of a pooled sampling distribution simulated via the repeated half-sample bootstrap with 1000 replications per imputation. Data sources: (39-42).

**Table S5. Estimates for Total, Direct, and Indirect Effects of Neighborhood Poverty by Race**

| Estimands                      | Reading Test Scores |                                           | Math Test Scores |                                           |
|--------------------------------|---------------------|-------------------------------------------|------------------|-------------------------------------------|
|                                | Point Estimate      | [2.5, 97.5] Percentile Bootstrap Interval | Point Estimate   | [2.5, 97.5] Percentile Bootstrap Interval |
| <i>Whites (n ≈ 4400)</i>       |                     |                                           |                  |                                           |
| Average Total Effect           | -0.060              | [-0.134, -0.018]                          | -0.124           | [-0.186, -0.061]                          |
| Natural Direct Effect          | -0.056              | [-0.098, -0.028]                          | -0.088           | [-0.147, -0.042]                          |
| Natural Indirect Effect        | -0.004              | [-0.050, 0.017]                           | -0.036           | [-0.064, -0.002]                          |
| <i>Blacks (n ≈ 1700)</i>       |                     |                                           |                  |                                           |
| Average Total Effect           | -0.075              | [-0.153, -0.016]                          | -0.075           | [-0.154, 0.000]                           |
| Natural Direct Effect          | -0.042              | [-0.086, -0.009]                          | -0.042           | [-0.105, 0.005]                           |
| Natural Indirect Effect        | -0.032              | [-0.078, 0.002]                           | -0.033           | [-0.067, 0.003]                           |
| <i>Hispanics (n ≈ 2200)</i>    |                     |                                           |                  |                                           |
| Average Total Effect           | -0.159              | [-0.280, -0.070]                          | -0.123           | [-0.206, -0.036]                          |
| Natural Direct Effect          | -0.060              | [-0.125, -0.017]                          | -0.065           | [-0.132, -0.012]                          |
| Natural Indirect Effect        | -0.099              | [-0.171, -0.041]                          | -0.058           | [-0.089, -0.019]                          |
| <i>Another Race (n ≈ 2400)</i> |                     |                                           |                  |                                           |
| Average Total Effect           | -0.070              | [-0.274, -0.055]                          | -0.117           | [-0.203, -0.038]                          |
| Natural Direct Effect          | -0.074              | [-0.124, -0.019]                          | -0.095           | [-0.132, -0.014]                          |
| Natural Indirect Effect        | 0.004               | [-0.169, 0.005]                           | -0.021           | [-0.088, 0.001]                           |

Notes: estimates are reported in standard deviation units and are computed using regression-imputation and random forests; they are weighted and combined across 5 imputations; confidence intervals are based on the [2.5, 97.5] percentiles of a pooled sampling distribution simulated via the repeated half-sample bootstrap with 1000 replications per imputation. Data sources: (39-42).

**Table S6. Estimates for Total, Direct, and Indirect Effects of Neighborhood Poverty by Family Income**

| Estimands                                | Reading Test Scores |                                           | Math Test Scores |                                           |
|------------------------------------------|---------------------|-------------------------------------------|------------------|-------------------------------------------|
|                                          | Point Estimate      | [2.5, 97.5] Percentile Bootstrap Interval | Point Estimate   | [2.5, 97.5] Percentile Bootstrap Interval |
| <i>&gt; Two-thirds of Median Income</i>  |                     |                                           |                  |                                           |
| <i>(n ≈ 7800)</i>                        |                     |                                           |                  |                                           |
| Average Total Effect                     | -0.087              | [-0.153, -0.048]                          | -0.128           | [-0.189, -0.067]                          |
| Natural Direct Effect                    | -0.063              | [-0.104, -0.035]                          | -0.087           | [-0.143, -0.042]                          |
| Natural Indirect Effect                  | -0.023              | [-0.061, -0.006]                          | -0.041           | [-0.065, -0.013]                          |
| <i>&lt;= Two-thirds of Median Income</i> |                     |                                           |                  |                                           |
| <i>(n ≈ 2900)</i>                        |                     |                                           |                  |                                           |
| Average Total Effect                     | -0.092              | [-0.187, -0.026]                          | -0.083           | [-0.179, 0.017]                           |
| Natural Direct Effect                    | -0.037              | [-0.091, -0.005]                          | -0.048           | [-0.125, 0.013]                           |
| Natural Indirect Effect                  | -0.055              | [-0.104, -0.010]                          | -0.035           | [-0.076, 0.010]                           |

Notes: estimates are reported in standard deviation units and are computed using regression-imputation and random forests; they are weighted and combined across 5 imputations; confidence intervals are based on the [2.5, 97.5] percentiles of a pooled sampling distribution simulated via the repeated half-sample bootstrap with 1000 replications per imputation. Data sources: (39-42).



**Table S7. Estimates for Total, Direct, and Indirect Effects of Neighborhood Poverty by Region**

| Estimands                   | Reading Test Scores |                                           | Math Test Scores |                                           |
|-----------------------------|---------------------|-------------------------------------------|------------------|-------------------------------------------|
|                             | Point Estimate      | [2.5, 97.5] Percentile Bootstrap Interval | Point Estimate   | [2.5, 97.5] Percentile Bootstrap Interval |
| <i>Northeast (n ≈ 1600)</i> |                     |                                           |                  |                                           |
| Average Total Effect        | -0.080              | [-0.148, -0.037]                          | -0.121           | [-0.193, -0.053]                          |
| Natural Direct Effect       | -0.070              | [-0.110, -0.035]                          | -0.086           | [-0.148, -0.038]                          |
| Natural Indirect Effect     | -0.010              | [-0.052, 0.009]                           | -0.035           | [-0.067, -0.004]                          |
| <i>Midwest (n ≈ 2500)</i>   |                     |                                           |                  |                                           |
| Average Total Effect        | -0.058              | [-0.119, -0.025]                          | -0.109           | [-0.167, -0.045]                          |
| Natural Direct Effect       | -0.047              | [-0.084, -0.023]                          | -0.074           | [-0.128, -0.030]                          |
| Natural Indirect Effect     | -0.011              | [-0.049, 0.009]                           | -0.035           | [-0.065, -0.002]                          |
| <i>South (n ≈ 3800)</i>     |                     |                                           |                  |                                           |
| Average Total Effect        | -0.096              | [-0.169, -0.047]                          | -0.113           | [-0.175, -0.046]                          |
| Natural Direct Effect       | -0.055              | [-0.096, -0.028]                          | -0.071           | [-0.129, -0.026]                          |
| Natural Indirect Effect     | -0.040              | [-0.083, -0.012]                          | -0.042           | [-0.063, -0.012]                          |
| <i>West (n ≈ 2700)</i>      |                     |                                           |                  |                                           |
| Average Total Effect        | -0.110              | [-0.174, -0.048]                          | -0.126           | [-0.174, -0.048]                          |
| Natural Direct Effect       | -0.057              | [-0.097, -0.027]                          | -0.082           | [-0.127, -0.027]                          |
| Natural Indirect Effect     | -0.053              | [-0.086, -0.013]                          | -0.045           | [-0.064, -0.012]                          |

Notes: estimates are reported in standard deviation units and are computed using regression-imputation and random forests; they are weighted and combined across 5 imputations; confidence intervals are based on the [2.5, 97.5] percentiles of a pooled sampling distribution simulated via the repeated half-sample bootstrap with 1000 replications per imputation. Data sources: (39-42).

**Table S8. Estimates for Total, Direct, and Indirect Effects of Neighborhood Poverty by Homeownership Status**

| Estimands                    | Reading Test Scores |                                           | Math Test Scores |                                           |
|------------------------------|---------------------|-------------------------------------------|------------------|-------------------------------------------|
|                              | Point Estimate      | [2.5, 97.5] Percentile Bootstrap Interval | Point Estimate   | [2.5, 97.5] Percentile Bootstrap Interval |
| <i>Homeowners (n ≈ 4900)</i> |                     |                                           |                  |                                           |
| Average Total Effect         | -0.083              | [-0.155, -0.041]                          | -0.134           | [-0.203, -0.068]                          |
| Natural Direct Effect        | -0.060              | [-0.104, -0.031]                          | -0.088           | [-0.150, -0.044]                          |
| Natural Indirect Effect      | -0.023              | [-0.063, -0.001]                          | -0.047           | [-0.076, -0.010]                          |
| <i>Renters (n ≈ 5800)</i>    |                     |                                           |                  |                                           |
| Average Total Effect         | -0.093              | [-0.168, -0.045]                          | -0.100           | [-0.175, -0.021]                          |
| Natural Direct Effect        | -0.053              | [-0.098, -0.023]                          | -0.066           | [-0.129, -0.013]                          |
| Natural Indirect Effect      | -0.040              | [-0.081, -0.014]                          | -0.034           | [-0.060, -0.003]                          |

Notes: estimates are reported in standard deviation units and are computed using regression-imputation and random forests; they are weighted and combined across 5 imputations; confidence intervals are based on the [2.5, 97.5] percentiles of a pooled sampling distribution simulated via the repeated half-sample bootstrap with 1000 replications per imputation. Data sources: (39-42).

**Table S9. Total, Direct, and Indirect Effects of Neighborhood Poverty Estimated from Alternative Random Forest (RF) algorithms and Super Learners**

| Estimands                  | RFs with Default Hyperparameters |                                           | RFs with Tuned Sampling Fraction |                                           | Super Learners |                                           |
|----------------------------|----------------------------------|-------------------------------------------|----------------------------------|-------------------------------------------|----------------|-------------------------------------------|
|                            | Point Estimate                   | [2.5, 97.5] Percentile Bootstrap Interval | Point Estimate                   | [2.5, 97.5] Percentile Bootstrap Interval | Point Estimate | [2.5, 97.5] Percentile Bootstrap Interval |
| <i>Reading Test Scores</i> |                                  |                                           |                                  |                                           |                |                                           |
| Average Total Effect       | -0.095                           | [-0.158, -0.055]                          | -0.114                           | [-0.172, -0.070]                          | -0.108         | [-0.161, -0.057]                          |
| Natural Direct Effect      | -0.062                           | [-0.101, -0.033]                          | -0.088                           | [-0.134, -0.047]                          | -0.076         | [-0.116, -0.042]                          |
| Natural Indirect Effect    | -0.033                           | [-0.067, -0.015]                          | -0.026                           | [-0.059, -0.012]                          | -0.032         | [-0.058, -0.005]                          |
| <i>Math Test Scores</i>    |                                  |                                           |                                  |                                           |                |                                           |
| Average Total Effect       | -0.120                           | [-0.178, -0.056]                          | -0.115                           | [-0.175, -0.056]                          | -0.116         | [-0.178, -0.056]                          |
| Natural Direct Effect      | -0.081                           | [-0.129, -0.036]                          | -0.085                           | [-0.126, -0.041]                          | -0.085         | [-0.126, -0.038]                          |
| Natural Indirect Effect    | -0.039                           | [-0.061, -0.014]                          | -0.029                           | [-0.058, -0.009]                          | -0.032         | [-0.062, -0.012]                          |

Notes: estimates are reported in standard deviation units and are computed using regression-imputation and random forests; they are weighted and combined across 5 imputations; confidence intervals are based on the [2.5, 97.5] percentiles of a pooled sampling distribution simulated via the repeated half-sample bootstrap with 200 replications per imputation; weights for the super learners are computed using 4-fold cross-validation and non-negative least squares. Data sources: (39-42).

**Table S10. Unweighted Estimates for the Total, Direct, and Indirect Effects of Neighborhood Poverty**

| Estimands                  | Point Estimate | [2.5, 97.5] Percentile Bootstrap Interval |
|----------------------------|----------------|-------------------------------------------|
| <i>Reading Test Scores</i> |                |                                           |
| Average Total Effect       | -0.108         | [-0.159, -0.067]                          |
| Natural Direct Effect      | -0.074         | [-0.107, -0.040]                          |
| Natural Indirect Effect    | -0.035         | [-0.063, -0.020]                          |
| <i>Math Test Scores</i>    |                |                                           |
| Average Total Effect       | -0.103         | [-0.151, -0.054]                          |
| Natural Direct Effect      | -0.071         | [-0.104, -0.033]                          |
| Natural Indirect Effect    | -0.033         | [-0.059, -0.016]                          |

Notes: estimates are reported in standard deviation units and are computed using regression-imputation and random forests; they are unweighted and combined across 5 imputations; confidence intervals are based on the [2.5, 97.5] percentiles of a pooled sampling distribution simulated via the repeated half-sample bootstrap with 1000 replications per imputation. Data sources: (39-42).
